# Supplementary material for: Consistency of Food Preferences in Australian Children from 2 to 5 Years of Age
Source: Preprints.org preprint supplement (doi:10.20944/preprints201806.0314.v1), 2018-06-20

### Supplementary table 1.

Nine categories of food preference change that could occur between two and five years of age.

| Preference at two years |                         |           | Preference at five years |
|-------------------------|-------------------------|-----------|--------------------------|
| 1                       | Like                    | <i>to</i> | Neither like or dislike  |
| 2                       | Like                    | <i>to</i> | Dislike                  |
| 3                       | Neither like or dislike | <i>to</i> | Like                     |
| 4                       | Neither like or dislike | <i>to</i> | Dislike                  |
| 5                       | Dislike                 | <i>to</i> | Like                     |
| 6                       | Dislike                 | <i>to</i> | Neither like or dislike  |
| 7                       | Never tried             | <i>to</i> | Like                     |
| 8                       | Never tried             | <i>to</i> | Neither like or dislike  |
| 9                       | Never tried             | <i>to</i> | Dislike                  |

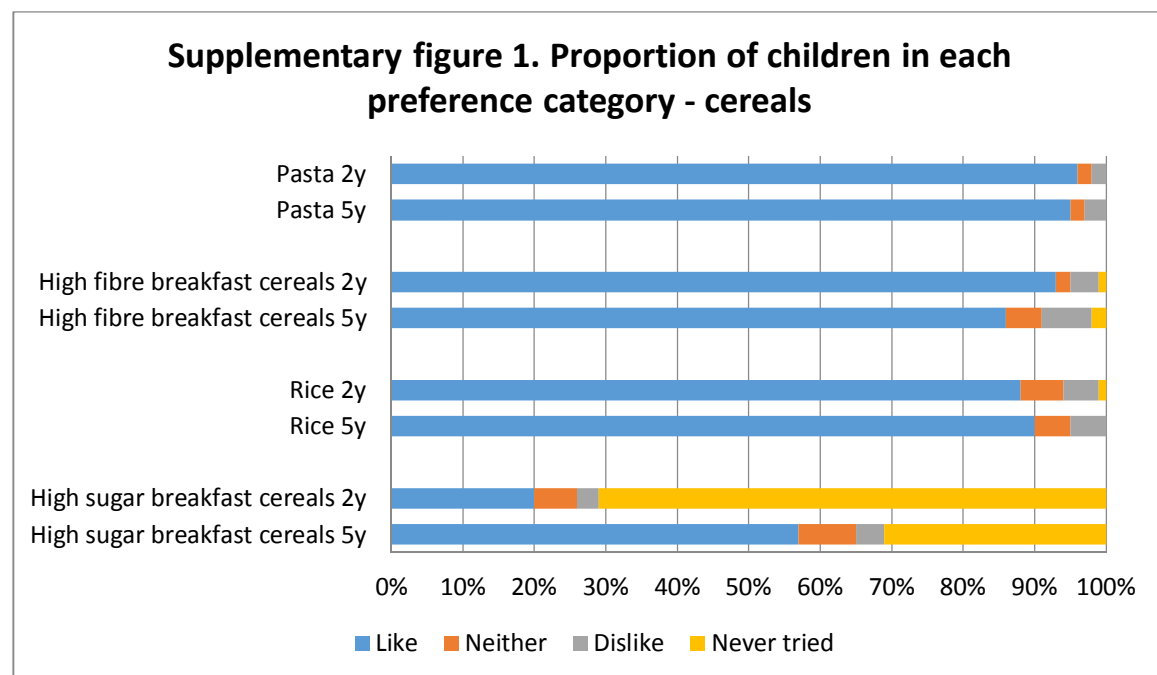

Footnote for all figures: Foods are listed in the same order as in Table 2 i.e. the proportion of children with the same reported food preference at two and five years of age, decreases from top to bottom.

**Supplementary figure 2. Proportion of children in each preference category - vegetables**

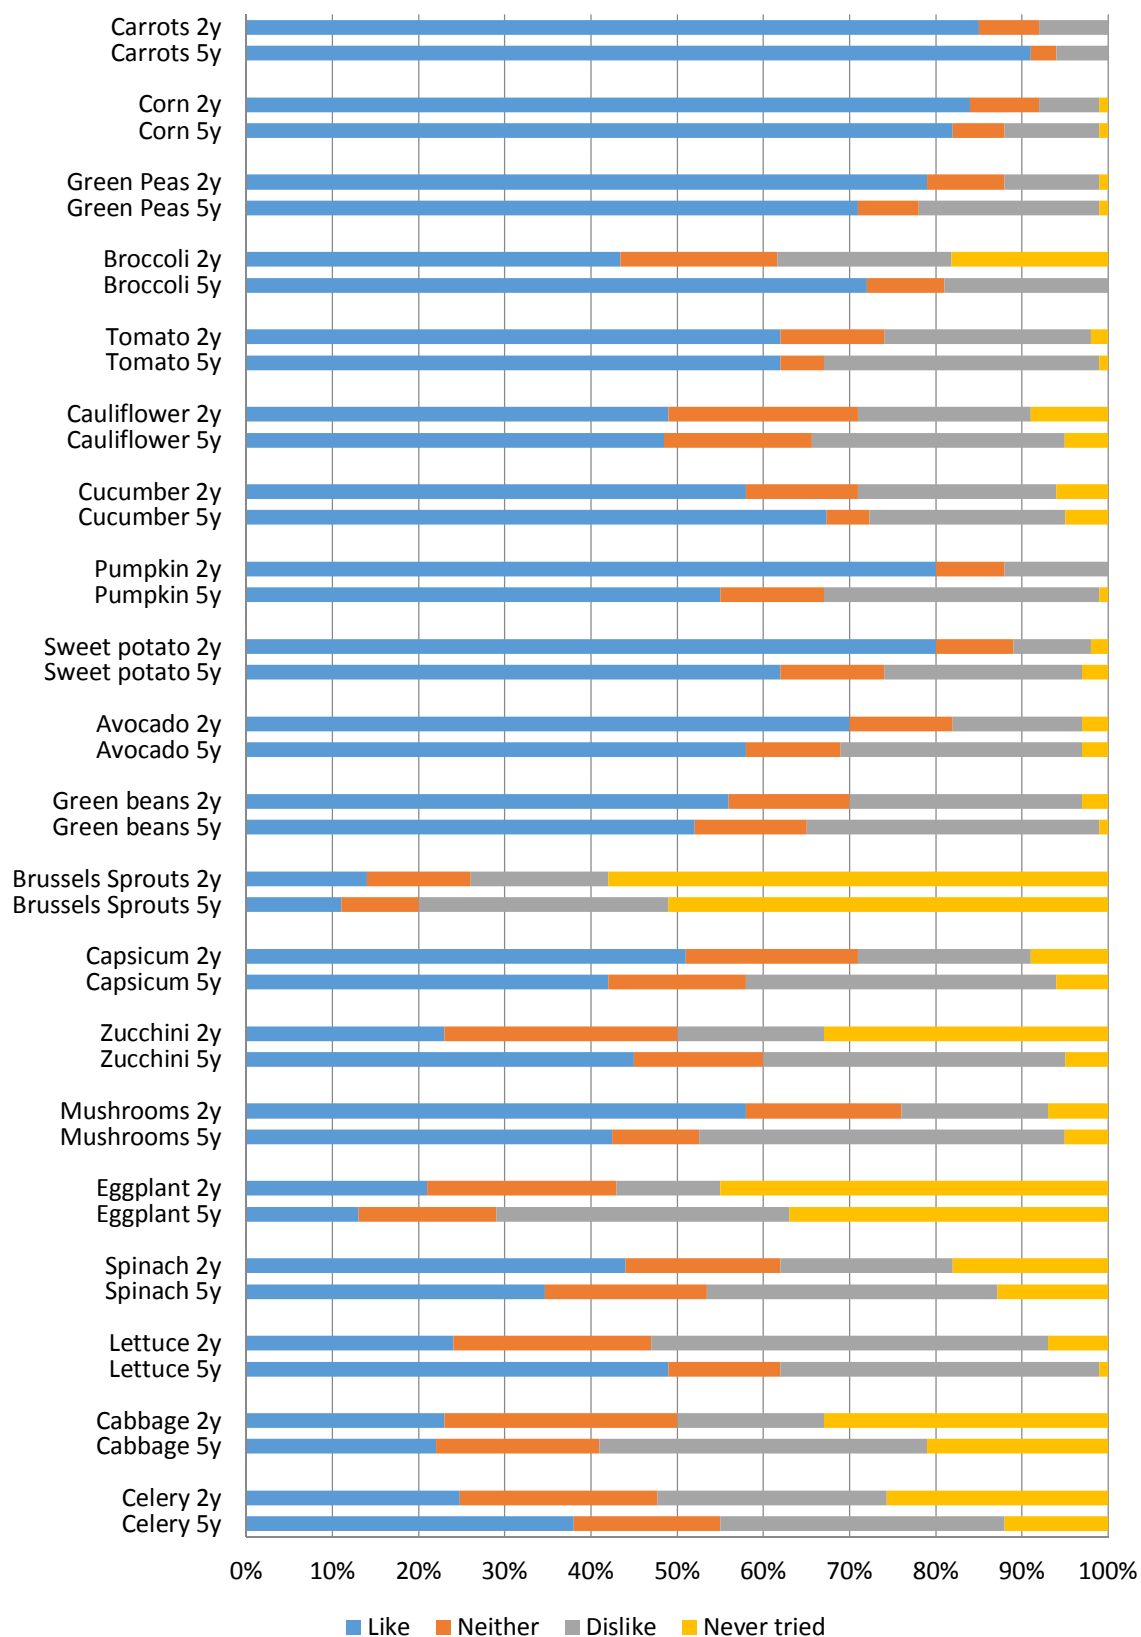

**Supplementary figure 3. Proportion of children in each preference category - fruit**

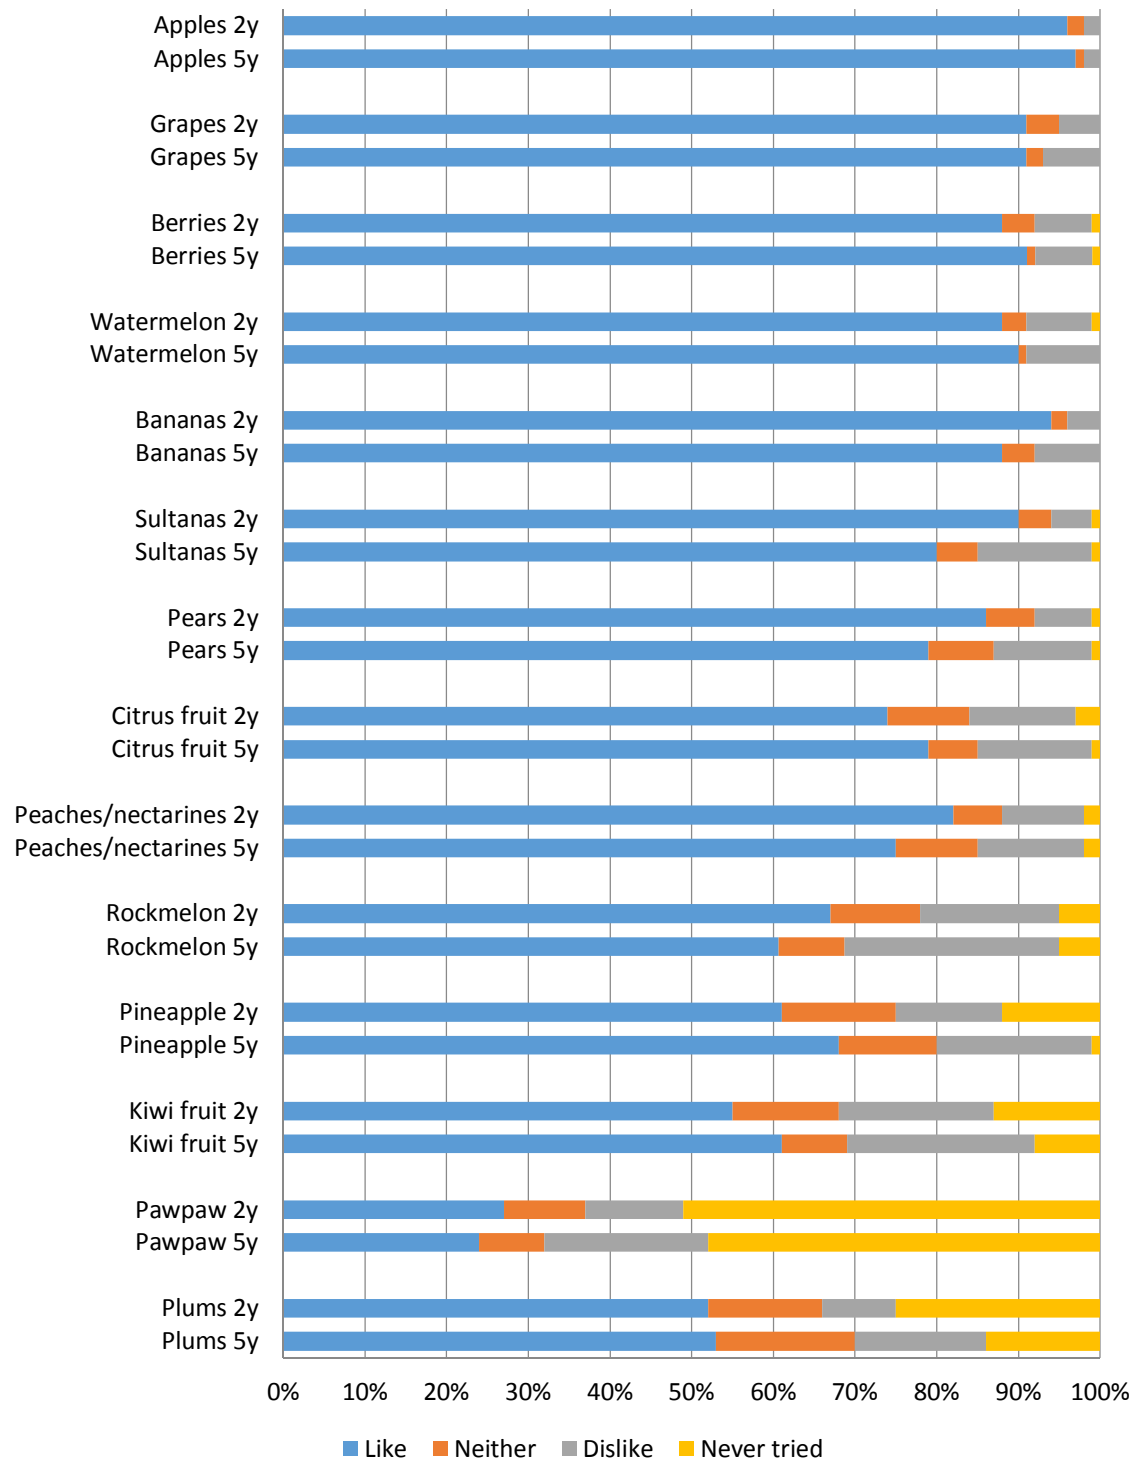

**Supplementary figure 4. Proportion of children in each preference category - meat/alternatives**

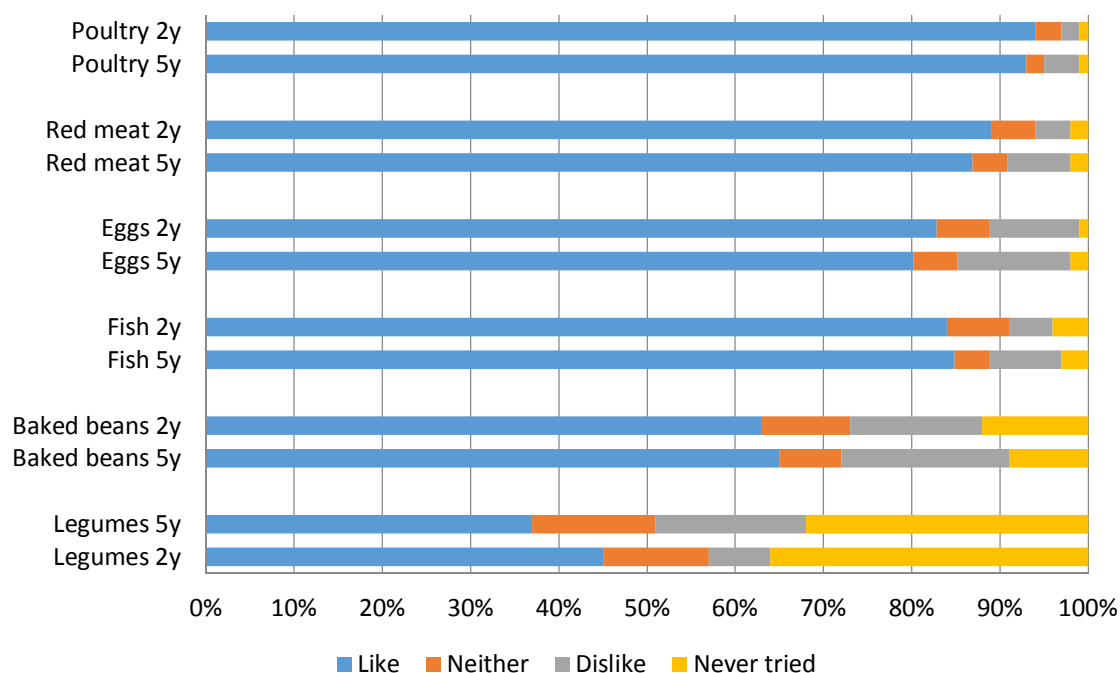

**Supplementary figure 5. Proportion of children in each preference category - dairy**

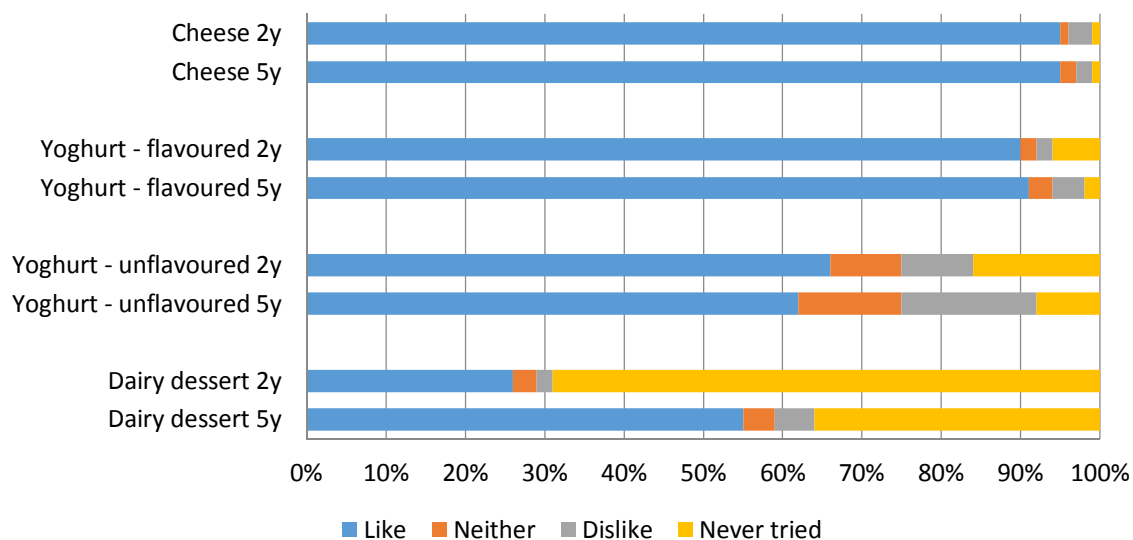

Supplement: Supplementary file 1 [file supplementary]
